# Supplementary material for: A New Formulation for the Dial-a-Ride Problem
Source: Atypon-hosted journal article supplement (doi:10.1287/trsc.2021.1044), 2021-08-05
Supplement: trsc.2021.1044.sm1.pdf [file trsc.2021.1044.sm1.pdf]

# Appendix

## Appendix A: Proofs

### A.1. Proposition 4

For convenience, let  $\tau = \tau_f^{\text{late}}$ . The proof first requires the following fact.

PROPOSITION A.1. *For  $1 \leq k \leq K$ , if there is waiting time in  $\tau_f^{\text{late}}(t)$  between  $i_1$  and  $i_k$  then there exists  $1 \leq k^* < k$  such that  $\tau_{k^*}(t) = \tau_{k^*}(l_{i_K})$ .*

*Proof.* We proceed by induction, assuming the statement is true for  $k = 1, \dots, k'$ . Suppose there is waiting time between 1 and  $k' + 1$ . Without loss of generality assume that there is waiting time between  $k'$  and  $k' + 1$ , else we may apply the inductive hypothesis.

For the sake of contradiction, suppose  $\tau_k(t) < \tau_k(l_{i_K})$  for all  $k = 1, \dots, k' + 1$ . Define

$$\epsilon = \min \left\{ (\tau_1(l_{i_K}) - \tau_1(t)), \dots, (\tau_{k'+1}(l_{i_K}) - \tau_{k'+1}(t)), (\tau_{k'+1}(t) - \tau_{k'}(t) - t_{i_{k'}, i_{k'+1}}) \right\}$$

noting that  $\epsilon > 0$  since there is waiting time between  $k'$  and  $k' + 1$ . Let

$$\bar{\tau}(t) = \begin{cases} \tau_k(t) + \epsilon & \text{if } 1 \leq k \leq k' \\ \tau_k(t) & \text{otherwise} \end{cases}$$

which is a valid schedule by construction and services  $i_1$  later than  $\tau(t)$ . This contradicts the definition of  $\tau(t)$  as the latest schedule, and therefore there is some  $1 \leq k^* \leq k'$  where  $\tau_{k^*}(t) = \tau_{k^*}(l_{i_K})$ .

For the base case,  $k = 1$ , there can never be waiting time between  $i_1$  and  $i_1$ , so the statement is vacuously true.  $\square$

Let  $k^*$  be the smallest  $k$  such that  $\tau_k(t) = \tau_k(l_{i_K})$ . Since  $k^*$  is the smallest such index, there cannot be any waiting time between 1 and  $k^*$ , by the above proposition. Thus,

$$T_f(1, k^*) = \tau_{k^*}(t) - \tau_1(t) = \tau_{k^*}(l_{i_K}) - \tau_1(t) \geq \tau_{k^*}(l_{i_K}) - \tau_1(l_{i_K})$$

and for any  $t \geq E_f$  it is also true that  $\tau_{k^*}(t) - \tau_1(t) \geq T_f(1, k^*)$ . Therefore,

$$\tau_{k^*}(l_{i_K}) - \tau_1(t) = \tau_{k^*}(l_{i_K}) - \tau_1(l_{i_K}) = T_f(1, k^*)$$

which implies  $\tau_1(t) = \tau_1(l_{i_K}) =: L_f$ .

### A.2. Proposition 6

If  $f(x)$  is constant on  $[a, b]$ , then  $f(x) = f(b) \geq g(b) \geq g(x)$ . Otherwise, let  $x_f \in (a, b)$  be the point at which the gradient of  $f$  changes from 0 to 1, so that

$$f(x) = \max\{x - x_f + f(x_f), f(x_f)\}$$

Likewise define  $x_g$ . Suppose  $f(x_f) < g(x_f)$ , then  $g(a) \leq f(a) = f(x_f) < g(x_f)$ , which implies that  $g(x)$  must be increasing on  $[x_f, b]$ . Consequently, for  $x \in [x_f, b]$ ,

$$g(x) = x - x_f + g(x_f) > x - x_f - f(x_f) = f(x)$$

and in particular  $g(b) > f(b)$ , a contradiction. Therefore  $g(x_f) \leq f(x_f)$ . Fix  $x \in [a, b]$ , there are three cases to cover:

Case (i):  $x \in [a, x_f]$ . Since  $x \leq x_f$ ,  $g(x) \leq g(x_f) \leq f(x_f) = f(x)$ .

Case (ii):  $x \in (x_f, b]$  and  $x_g \leq x_f$ . As  $x_g \leq x_f$ ,  $g(x)$  must be increasing on  $(x_f, b]$ , so

$$g(x) = x - x_f + g(x_f) \leq x - x_f + f(x_f) = f(x)$$

Case (iii):  $x \in (x_f, b]$  and  $x_g > x_f$ . In this case  $g(x)$  is constant at  $x_f$ , so  $g(x_f) = g(x_g)$  and

$$g(x) = x - x_g + g(x_g) = x - x_g + g(x_f) < x - x_f + f(x_f) = f(x)$$

In all cases,  $f(x) \geq g(x)$ .

### A.3. Proposition 7

If  $\tau_f^{\text{late}}(t)$  contains no waiting time, then

$$\tau_{f,1}^{\text{late}}(t) = t - T_f \geq t - T_g \geq \tau_{g,1}^{\text{late}}(t)$$

otherwise by Proposition 4,  $\tau_{f,1}^{\text{late}}(t) = L_f$  and we arrive at the same result.

$$\tau_{f,1}^{\text{late}}(t) = L_f \geq L_g \geq \tau_{g,1}^{\text{late}}(t)$$

### A.4. Proposition 9

Let  $(x, y)$  satisfy (33). Using flow and cover constraints again, the following inequalities are true for any point in the LP hull

$$y_{a_{l-1}} \leq \sum_{f \in F_{a_{l-1}}^-} x_f \leq 1$$

Setting  $S = \{f_1, \dots, f_{l-1}\} \cup \{a_1, \dots, a_{l-1}\}$  and  $Z = F_{a_{l-1}}^-$ , Lemma 1 gives part 1 and the implication of part 2. To see that the converse is not true, let  $(f_1, f_2)$  be an illegal chain in a fractional route with value  $2/3$ , so that  $x_{f_1} = x_{f_2} = y_{a_1} = 2/3$ . In addition, suppose  $x_f = 0$  for all  $f \in F_{a_1}^- \setminus \{f_2\}$ . The left-hand side of (32) reads  $x_{f_1} + y_{a_1} + x_{f_2} = 2$ , so (32) is not violated. On the other hand, the left-hand side of (33) evaluates to  $4/3 > 1$ , whilst the summation on the right-hand side evaluates to 0, so the inequality is violated.

### A.5. Proposition 10

Suppose (38) is violated at an integer solution  $(x, y)$ . Since there are  $2l - 3$  terms on the left-hand side, the inequality may only be violated when the left-hand side is equal to  $2l - 3$  and the right-hand side is equal to  $2l - 4$ . In other words, the chain  $(f_1, \dots, f_{l-1})$  is in the solution, and no arcs from  $A_c^-$  are in the solution. Therefore, by flow conservation, an arc from  $A_{f_{l-1}}^- \setminus A_c^-$  is in the solution, and so too is some fragment  $g$  which starts at  $\text{End}(a)$ . However, the chain  $(f_1, \dots, f_{l-1}, g)$  is illegal by definition of  $A_c^-$ , so the solution must be illegal as well. Obviously,  $c$  is cut off, since  $a_{l-1} \notin A_c^-$  by assumption, so the first part of the proposition is true.

The flow and cover constraints (5)–(7) imply that for any fractional  $(x, y)$ ,

$$x_{f_{l-1}} \leq \sum_{a \in A_{f_{l-1}}^-} y_a \leq 1$$

Consider the inequality

$$\sum_{k=1}^{l-1} x_{f_k} + \sum_{k=1}^{l-2} y_{a_k} + \sum_{a \in A_{f_{l-1}}^- \setminus A_c^-} y_a \leq 2l - 3$$

and note that since  $a_{l-1} \in A_{f_{l-1}}^- \setminus A_c^-$ , this inequality implies (33) when  $F_c^- = \emptyset$ . Defining  $S = \{f_1, \dots, f_{l-1}\} \cup \{a_1, \dots, a_{l-2}\}$  and  $Z = A_{f_{l-1}}$  in lemma 1 proves that in the LP hull, (38) implies the above inequality, and therefore implies (33) as well.

As a counterexample to the converse, consider  $c = (f_1, f_2)$  and suppose  $x_{f_1} = x_{f_2} = y_{a_1} = 1/2$ , and  $y_a = 0$  for all  $a \in A_c^-$ . Then the left-hand side of (33) is  $x_{f_1} + y_{a_1} = 1$  so (33) is not violated, but (38) reads

$$x_{f_1} \leq \sum_{a \in A_c^-} y_a$$

which is clearly violated since the right-hand side is 0.

#### A.6. Proposition 12

Let  $(x, y)$  be a legal solution such that  $x_f = 1$ . If  $f$  is the last fragment in a route then  $y_a = 1$  where  $a = (\text{End}(f), o^-) \in A_{(f, \cdot)}$  by conservation of flow. Otherwise,  $f$  is followed by a fragment  $g$  where  $(f, g)$  is legal, since the route is legal. In this case  $y_a = 1$  where  $a = (\text{End}(f), \text{Start}(g)) \in A_f^-$ , and therefore  $g \in F_{(f, \cdot)} \cap F_a^-$  and  $a \in A_{(f, \cdot)}$ .

An almost identical proof may be given for the validity of inequality (44), which is the analogue to (43) considering compatible fragments that may be placed before an arc. Similar analogues exist for the Fragment-Arc and Fragment-Fragment inequalities, and their proofs are likewise omitted.

#### A.7. Proposition 13

Suppose  $(x, y)$  is a legal solution and  $x_f = 1$ . Since  $f$  does not end empty,  $f$  cannot be the last fragment in a route, and the result follows from the proof of Proposition 12.

#### A.8. Proposition 14

Suppose  $y_a = 1$  in a legal solution  $(x, y)$ . Using conservation of flow, there must be  $f \in F_a^+, g \in F_a^-$  such that  $x_f = x_g = 1$ . This implies the chain  $(f, g)$  forms part of a route in the solution, and is therefore legal. Hence,  $g \in F_{(f, \cdot)} \cap F_a^- \neq \emptyset$  so  $f \in F_{(a, \cdot)}$  and the inequality is satisfied.

## Appendix B: Enumeration algorithm details

During Step 1 of Algorithm 1 we iteratively extend paths which start on some pickup location  $p \in P$ . At every extension step we store three resources: the time  $t$ , which is the earliest we may arrive at the last node of the path, neglecting ride time constraints, the current load  $q$  and a hashmap  $\mathcal{T}$ .  $\mathcal{T}$  contains as keys those customers currently onboard, as well as the origin depot location. The values of  $\mathcal{T}$  are underestimates of the ride time and the total route duration.

Algorithm 2 details the path generation and trimming steps of Algorithm 1. The function  $\text{GETSCHEDULE}(\rho)$  attempts to compute a DARP schedule for the path  $\rho$ , using the method of Tang et al. (2010). The function  $\text{TRIMPATH}(\rho)$  enumerates all the possible restricted fragments resulting from the route-path  $\rho$  (as described in Section 4).

---

### Algorithm 1 The UPDATE step of algorithm 2

---

```

procedure UPDATE( $i, j, t, q, \mathcal{T}$ )
   $t \leftarrow \max\{e_j, t + t_{ij}\}$ 
   $q \leftarrow q + q_j$ 
  for  $k \in \mathcal{T}$  do
     $\mathcal{T}(k) \leftarrow \mathcal{T}(k) + t_{ij}$ 
  end for
  if  $j \in D$  then
    remove key  $p$  from  $\mathcal{T}$  where  $d(p) = j$ 
  else
    insert  $\mathcal{T}(j) \leftarrow 0$ 
  end if
  return  $t, q, \mathcal{T}$ 
end procedure

```

---

---

**Algorithm 2** Generating  $F'$  by extending and trimming paths.

---

Initialise set of potential restricted fragments:  $F' \leftarrow \emptyset$

**procedure** EXTEND( $\rho, t, q, \mathcal{T}$ )

$i \leftarrow$  last location of path  $\rho$

**if**  $t > l_i$  or  $q > Q$  or Any( $\mathcal{T}(j) > r_j$  for  $j \in \mathcal{T}$ ) or  $\mathcal{T}(o^+) + t_{i,o^-} > r_{o^+}$  **then**

**return false** ▷ Some constraint has been violated

**end if**

**if** the only key in  $\mathcal{T}$  is  $o^+$  **then**

**if** GETSCHEDULE( $\rho$ ) finds a legal schedule **then**

$F' \leftarrow F' \cup \text{TRIMPATH}(\rho)$ .

**return true**

**else**

**return false**

**end if**

**end if**

Initialise `can_complete`  $\leftarrow$  false

**for**  $j \in \mathcal{T}$  such that  $j \neq o^+$  **do** ▷ Loop through onboard customers

$t', q', \mathcal{T}' \leftarrow \text{UPDATE}(i, j + n, t, q, \mathcal{T})$

`can_complete`  $\leftarrow$  `can_complete`  $\vee$  EXTEND( $(\rho, d(j))$ ,  $t', q', \mathcal{T}'$ )

**end for**

**if**  $i \in P$  and `can_complete` **then** ▷ Extend to pickups only if a completion exists

**for**  $j \in P$  such that  $j \notin \rho$  **do**

$t', q', \mathcal{T}' \leftarrow \text{UPDATE}(i, j, t, q, \mathcal{T})$

`can_complete`  $\leftarrow$  `can_complete`  $\vee$  EXTEND( $(\rho, j)$ ,  $t', q', \mathcal{T}'$ )

**end for**

**end if**

**return** `can_complete`

**end procedure**

**for**  $p \in P$  **do** ▷ This could be done in parallel

    EXTEND( $(p, \cdot)$ ,  $e_p, q_p, \{(o^+ \rightarrow t_{o^+,p}), (p \rightarrow 0)\}$ )

**end for**

---

---

**Appendix C: Branch-and-Cut Procedure**


---



---

**Algorithm 3** The Branch-Cut procedure of Algorithm 2
 

---

```

procedure BRANCH-CUT(USE_VI, USE_HEUR)
  while new node solved do
    if node gives new integer solution then
      if cyclic route or schedule violation then
        Add IPEC and cycle constraints (33) and (38)–(41)
      end if
      if USE_HEUR and OptGap > 0.01 then
        run LNS heuristic: solve with BRANCH-CUT(false, false)
        if LNS failed and IPEC/cycle constraint added and (50) satisfied then
          run FR heuristic: solve with BRANCH-CUT(false, false)
        end if
      end if
    else if USE_VI then
      if OptGap > 0.001 and (explored nodes  $\leq$  10 or (49) satisfied) then
        Separate and add valid inequalities (42)–(48) with violation > 0.01
      end if
    end if
  end while
end procedure

```

---

## Appendix D: Notation

**Table 1** Summary of notation.

| Symbol                     | Description                                                                                                                  |
|----------------------------|------------------------------------------------------------------------------------------------------------------------------|
| $n$                        | Number of customers.                                                                                                         |
| $P$                        | Pickup locations.                                                                                                            |
| $D$                        | Delivery locations.                                                                                                          |
| $o^+, o^-$                 | Origin and destination depot locations, respectively.                                                                        |
| $N$                        | All locations ( $N = P \cup D \cup \{o^+, o^-\}$ ).                                                                          |
| $d(p)$                     | Delivery location corresponding to $p \in P$ .                                                                               |
| $t_{ij}$                   | Travel time between $i, j \in N$ .                                                                                           |
| $c_{ij}$                   | Travel cost between $i, j \in N$ .                                                                                           |
| $q_i$                      | Demand of location $i \in N$ .                                                                                               |
| $Q$                        | Capacity of a vehicle.                                                                                                       |
| $r_p$                      | Maximum ride time of customer $p \in P$ .                                                                                    |
| $r_{o^+}$                  | Maximum route duration.                                                                                                      |
| $[e_i, l_i]$               | Time window of location $i \in N$ .                                                                                          |
| $N$                        | Set of abstract nodes.                                                                                                       |
| $P$                        | Set of nodes with pickup locations.                                                                                          |
| $D$                        | Set of nodes with delivery locations.                                                                                        |
| $A$                        | Set of arcs between nodes.                                                                                                   |
| $F$                        | Set of restricted fragments.                                                                                                 |
| $F_n^-$                    | Restricted fragments starting at node $n$ .                                                                                  |
| $F_n^+$                    | Restricted fragments ending at node $n$ .                                                                                    |
| $A_n^-$                    | Arcs starting at node $n$ .                                                                                                  |
| $A_n^+$                    | Arcs ending at node $n$ .                                                                                                    |
| $F_i$                      | Fragments which visit location $i \in P \cup D$ .                                                                            |
| Load( $n$ )                | The partial load at node $n \in N$ .                                                                                         |
| Loc( $n$ )                 | The physical location, $\text{Loc}(n) \in N$ , for node $n \in N$ .                                                          |
| Start( $\cdot$ )           | The start node for a fragment or arc.                                                                                        |
| End( $\cdot$ )             | The end node for a fragment or arc.                                                                                          |
| Locs( $f$ )                | The set of physical locations, $\text{Locs}(f) \subset N$ that $f$ visits.                                                   |
| $T_f$                      | The sum of travel within $f$ .                                                                                               |
| $\tau_f^{\text{early}}(t)$ | The earliest schedule of fragment $f$ starting no earlier than $t$ .                                                         |
| $\tau_f^{\text{late}}(t)$  | The latest assignment of fragment $f$ finishing no later than $t$ .                                                          |
| $E_f$                      | The earliest time service may start at the last location in $f$ .                                                            |
| $L_f$                      | The latest time service may start at the first location in $f$ .                                                             |
| $F_a^+$                    | Shorthand for $F_{\text{Start}(a)}^+$ .                                                                                      |
| $F_a^-$                    | Shorthand for $F_{\text{End}(a)}^-$ .                                                                                        |
| $A_f^+$                    | Shorthand for $A_{\text{Start}(f)}^+$ .                                                                                      |
| $A_f^-$                    | Shorthand for $A_{\text{End}(f)}^-$ .                                                                                        |
| $c$                        | A chain of fragments; $c = (f_1, \dots, f_l)$ .                                                                              |
| $F_c^-$                    | The fragments $g \in F$ which make the chain $(f_1, \dots, f_{l-1}, g)$ legal.                                               |
| $F_c^+$                    | The fragments $g \in F$ which make the chain $(g, f_2, \dots, f_l)$ legal.                                                   |
| $A_c^-$                    | The arcs $a \in A_{f_{l-1}}^-$ for which there exists a $g \in F_a^-$ that makes the chain $(f_1, \dots, f_{l-1}, g)$ legal. |
| $A_c^+$                    | The arcs $a \in A_{f_1}^+$ for which there exists a $g \in F_a^+$ that makes the chain $(g, f_2, \dots, f_l)$ legal.         |
| $F_{(f, \cdot)}$           | Fragments which can be placed after $f$ in a route.                                                                          |
| $F_{(\cdot, f)}$           | Fragments which can be placed before $f$ in a route.                                                                         |
| $A_{(f, \cdot)}$           | Arcs leaving $\text{End}(f)$ which lead to the depot or to a compatible fragment.                                            |
| $A_{(\cdot, f)}$           | Arcs ending at $\text{Start}(f)$ which lead from the depot or from a compatible fragment.                                    |
| $F_{(a, \cdot)}$           | Fragments which leave $\text{End}(a)$ for which there exists a compatible fragment arriving at $\text{Start}(a)$ .           |
| $F_{(\cdot, a)}$           | Fragments which arrive at $\text{Start}(a)$ for which there exists a compatible fragment leaving $\text{End}(a)$ .           |

## Appendix E: Single-Thread Computational Results

The results shown here are aggregates of 5 runs with different solver seeds, running on a 2.6GHz CPU with a single thread, 50GB of memory and a 1-hour time limit. As in Table 3, the UB column is the best UB founds across the 5 runs and the other columns are averages.

**Table 2** Single-threaded results for extended A and B instances. Columns have the same meaning as in Table 3

| Instance | B&C Tree |       |         |          |        | Valid Inequalities |       |       |       | Solve Time (s) |        |       |
|----------|----------|-------|---------|----------|--------|--------------------|-------|-------|-------|----------------|--------|-------|
|          | Nodes    | Cuts  | LB      | UB       | Gap    | AF                 | FA    | FF    | SR    | Network        | Tree   | Total |
| a2-16-X  | 1.0      | 0.0   | *       | 278.235  | *      | 3.0                | 3.0   | 0.0   | 0.0   | 0.0            | 0.1    | 0.1   |
| a2-20-X  | 0.0      | 2.0   | *       | 330.691  | *      | 8.0                | 8.0   | 0.0   | 0.0   | 0.0            | 0.1    | 0.1   |
| a2-24-X  | 1.0      | 13.6  | *       | 389.095  | *      | 10.0               | 10.2  | 0.0   | 8.0   | 0.1            | 0.3    | 0.4   |
| a3-18-X  | 0.0      | 7.0   | *       | 272.705  | *      | 7.0                | 7.0   | 0.0   | 2.0   | 0.1            | 0.1    | 0.2   |
| a3-24-X  | 1.0      | 7.0   | *       | 289.570  | *      | 8.0                | 8.0   | 4.0   | 0.0   | 0.1            | 0.1    | 0.3   |
| a3-30-X  | 0.0      | 8.0   | *       | 452.829  | *      | 13.0               | 10.0  | 0.0   | 8.0   | 0.1            | 0.2    | 0.3   |
| a3-36-X  | 1.0      | 0.0   | *       | 501.022  | *      | 1.0                | 1.0   | 0.0   | 0.0   | 0.1            | 0.1    | 0.3   |
| a4-16-X  | 1.0      | 16.0  | *       | 235.174  | *      | 5.6                | 5.6   | 0.0   | 16.0  | 0.1            | 0.2    | 0.2   |
| a4-24-X  | 0.0      | 4.0   | *       | 359.340  | *      | 3.0                | 3.0   | 0.0   | 4.0   | 0.1            | 0.1    | 0.2   |
| a4-32-X  | 1.0      | 13.2  | *       | 447.278  | *      | 3.0                | 3.0   | 0.0   | 13.6  | 0.2            | 0.3    | 0.5   |
| a4-40-X  | 0.0      | 0.0   | *       | 509.018  | *      | 10.0               | 10.0  | 4.0   | 4.0   | 0.3            | 0.3    | 0.6   |
| a4-48-X  | 7.2      | 16.4  | *       | 618.958  | *      | 20.8               | 23.2  | 6.4   | 27.0  | 0.4            | 1.4    | 1.8   |
| a5-40-X  | 0.0      | 7.0   | *       | 464.066  | *      | 10.0               | 10.0  | 4.0   | 36.0  | 0.3            | 0.3    | 0.6   |
| a5-50-X  | 1.0      | 5.6   | *       | 621.957  | *      | 8.2                | 8.2   | 4.0   | 26.4  | 0.4            | 0.7    | 1.1   |
| a5-60-X  | 1.0      | 14.8  | *       | 745.398  | *      | 13.2               | 14.0  | 0.4   | 8.8   | 0.6            | 0.9    | 1.5   |
| a6-48-X  | 1.0      | 10.4  | *       | 572.513  | *      | 21.8               | 22.6  | 17.4  | 11.2  | 0.8            | 0.8    | 1.6   |
| a6-60-X  | 1.0      | 15.6  | *       | 757.876  | *      | 19.2               | 22.6  | 9.4   | 59.6  | 1.1            | 1.4    | 2.4   |
| a6-72-X  | 1.0      | 15.0  | *       | 868.288  | *      | 26.0               | 22.6  | 9.8   | 15.6  | 1.0            | 1.7    | 2.6   |
| a7-56-X  | 1.0      | 8.8   | *       | 663.428  | *      | 33.8               | 36.2  | 19.8  | 23.8  | 0.8            | 1.6    | 2.4   |
| a7-70-X  | 1.0      | 10.0  | *       | 824.428  | *      | 33.4               | 36.4  | 21.2  | 35.0  | 1.7            | 1.9    | 3.6   |
| a7-84-X  | 61.0     | 19.8  | *       | 950.577  | *      | 62.0               | 60.8  | 39.4  | 38.2  | 1.8            | 6.6    | 8.5   |
| a8-64-X  | 1.0      | 10.0  | *       | 701.151  | *      | 33.6               | 35.6  | 27.6  | 38.0  | 1.7            | 2.1    | 3.8   |
| a8-80-X  | 1.0      | 29.2  | *       | 880.288  | *      | 42.6               | 42.6  | 33.8  | 56.8  | 1.6            | 3.7    | 5.3   |
| a8-96-X  | 324.6    | 44.2  | *       | 1115.093 | *      | 58.4               | 59.0  | 46.2  | 74.8  | 2.9            | 16.2   | 19.2  |
| b2-16-X  | 0.0      | 4.0   | *       | 244.319  | *      | 5.0                | 7.0   | 8.0   | 6.0   | 0.2            | 0.1    | 0.4   |
| b2-20-X  | 1.0      | 11.0  | *       | 280.211  | *      | 1.0                | 1.0   | 0.0   | 0.0   | 0.2            | 0.1    | 0.3   |
| b2-24-X  | 1.0      | 8.2   | *       | 372.589  | *      | 9.0                | 7.0   | 9.0   | 5.0   | 0.1            | 0.2    | 0.4   |
| b3-18-X  | 1.0      | 13.2  | *       | 251.949  | *      | 12.0               | 16.0  | 1.0   | 15.0  | 0.7            | 0.5    | 1.1   |
| b3-24-X  | 1.0      | 22.0  | *       | 321.209  | *      | 8.6                | 8.6   | 4.0   | 2.0   | 0.5            | 0.5    | 1.0   |
| b3-30-X  | 1.0      | 12.4  | *       | 433.282  | *      | 15.0               | 12.2  | 5.2   | 19.8  | 0.5            | 0.5    | 0.9   |
| b3-36-X  | 1.0      | 10.0  | *       | 486.014  | *      | 10.0               | 9.0   | 2.0   | 8.0   | 0.6            | 0.4    | 1.0   |
| b4-16-X  | 10.4     | 16.8  | *       | 233.172  | *      | 14.6               | 17.0  | 7.2   | 9.6   | 0.3            | 0.7    | 1.0   |
| b4-24-X  | 1.0      | 17.6  | *       | 292.969  | *      | 27.2               | 24.6  | 12.8  | 20.6  | 1.0            | 1.0    | 2.0   |
| b4-32-X  | 1.0      | 15.4  | *       | 410.142  | *      | 8.8                | 7.8   | 7.0   | 5.0   | 0.6            | 0.4    | 1.0   |
| b4-40-X  | 0.0      | 5.6   | *       | 478.675  | *      | 7.0                | 7.0   | 10.0  | 8.0   | 2.5            | 0.9    | 3.4   |
| b4-48-X  | 1.0      | 19.8  | *       | 543.252  | *      | 25.2               | 25.0  | 15.8  | 37.2  | 7.1            | 3.9    | 11.0  |
| b5-40-X  | 1.0      | 8.0   | *       | 494.781  | *      | 33.6               | 41.0  | 35.8  | 39.4  | 3.2            | 3.2    | 6.4   |
| b5-50-X  | 56.0     | 16.4  | *       | 606.820  | *      | 74.0               | 75.4  | 88.4  | 86.4  | 6.4            | 15.8   | 22.2  |
| b5-60-X  | 1.0      | 5.6   | *       | 704.518  | *      | 40.2               | 43.2  | 54.2  | 67.4  | 6.9            | 6.8    | 13.6  |
| b6-48-X  | 412.6    | 32.8  | *       | 577.822  | *      | 69.6               | 66.6  | 84.8  | 57.4  | 6.1            | 19.5   | 25.7  |
| b6-60-X  | 199.0    | 48.2  | *       | 703.240  | *      | 99.8               | 98.4  | 124.2 | 75.2  | 12.6           | 41.3   | 53.9  |
| b6-72-X  | 1.0      | 42.0  | *       | 789.145  | *      | 110.6              | 110.4 | 164.4 | 52.6  | 16.6           | 40.4   | 56.9  |
| b7-56-X  | 0.8      | 2.4   | *       | 603.941  | *      | 81.6               | 80.8  | 148.8 | 89.6  | 69.4           | 51.4   | 120.8 |
| b7-70-X  | 2169.6   | 78.0  | *       | 740.946  | *      | 213.4              | 226.4 | 294.6 | 116.0 | 21.3           | 139.9  | 161.2 |
| b7-84-X  | 3372.0   | 40.8  | *       | 961.569  | *      | 250.6              | 269.2 | 373.6 | 195.0 | 22.6           | 323.2  | 345.8 |
| b8-64-X  | 1624.6   | 42.0  | *       | 638.461  | *      | 230.8              | 239.8 | 372.6 | 142.0 | 55.4           | 241.0  | 296.4 |
| b8-80-X  | 6607.0   | 131.4 | *       | 822.222  | *      | 262.4              | 259.2 | 312.0 | 135.0 | 21.3           | 399.1  | 420.4 |
| b8-96-X  | 13082.8  | 126.2 | 947.543 | 951.952  | 0.463% | 530.6              | 574.4 | 980.0 | 280.6 | 91.3           | 3508.7 | 1h    |

**Table 3** Single-threaded results for RS and selected R instances. Columns have the same meaning as in Table 3

| Instance | B&C Tree |        |         |          |        | Valid Inequalities |       |       |       | Solve Time (s) |        |        |
|----------|----------|--------|---------|----------|--------|--------------------|-------|-------|-------|----------------|--------|--------|
|          | Nodes    | Cuts   | LB      | UB       | Gap    | AF                 | FA    | FF    | SR    | Network        | Tree   | Total  |
| R1a      | 0.0      | 0.0    | *       | 190.019  | *      | 27.0               | 27.0  | 37.6  | 44.0  | 121.9          | 18.6   | 140.5  |
| R7a      | 460.8    | 145.8  | *       | 291.711  | *      | 315.8              | 327.4 | 604.6 | 107.0 | 802.3          | 1444.2 | 2246.5 |
| R1b      | 1.0      | 11.0   | *       | 164.460  | *      | 81.6               | 82.8  | 210.4 | 70.6  | 1718.0         | 516.4  | 2234.4 |
| R1a-S    | 0.0      | 0.0    | *       | 206.725  | *      | 0.0                | 0.0   | 0.0   | 0.0   | 0.3            | 0.1    | 0.4    |
| R2a-S    | 135.0    | 100.4  | *       | 333.549  | *      | 130.4              | 111.8 | 78.0  | 96.6  | 8.8            | 29.5   | 38.3   |
| R3a-S    | 3992.2   | 141.6  | *       | 618.363  | *      | 159.2              | 164.4 | 80.4  | 308.8 | 7.0            | 102.8  | 109.9  |
| R4a-S    | 345.0    | 31.6   | *       | 675.724  | *      | 174.0              | 168.4 | 172.0 | 171.2 | 40.2           | 101.3  | 141.5  |
| R5a-S    | 612.6    | 273.6  | 728.625 | 735.736  | 0.966% | 412.2              | 440.6 | 477.0 | 402.2 | 221.7          | 3378.3 | 1h     |
| R6a-S    | 492.0    | 272.6  | 916.480 | 930.638  | 1.521% | 521.2              | 539.0 | 598.4 | 435.6 | 208.7          | 3391.3 | 1h     |
| R7a-S    | 987.6    | 144.2  | *       | 329.364  | *      | 62.2               | 62.6  | 25.6  | 47.4  | 0.8            | 35.2   | 36.0   |
| R8a-S    | 39369.6  | 547.0  | *       | 585.619  | *      | 438.4              | 522.4 | 319.4 | 339.6 | 12.5           | 1605.6 | 1618.0 |
| R9a-S    | 2124.0   | 2862.8 | 764.893 | -        | -      | 584.6              | 532.8 | 422.6 | 380.8 | 60.9           | 3539.1 | 1h     |
| R10a-S   | 531.2    | 1955.4 | 980.640 | 1074.537 | 8.738% | 651.4              | 664.2 | 551.2 | 414.4 | 192.3          | 3407.7 | 1h     |
| R1b-S    | 1.0      | 6.0    | *       | 185.165  | *      | 4.0                | 4.0   | 2.0   | 4.0   | 1.4            | 0.5    | 1.8    |
| R2b-S    | 5784.2   | 199.0  | *       | 335.791  | *      | 217.6              | 268.0 | 230.8 | 154.2 | 28.2           | 277.4  | 305.6  |
| R3b-S    | 5220.2   | 668.2  | 571.576 | 586.423  | 2.532% | 504.4              | 519.2 | 451.2 | 313.6 | 83.9           | 3516.1 | 1h     |
| R4b-S    | 215.8    | 530.0  | 611.543 | 636.184  | 3.873% | 477.2              | 511.6 | 644.0 | 265.2 | 616.9          | 2983.1 | 1h     |
| R5b-S    | 0.0      | 0.0    | -       | -        | -      | 0.0                | 0.0   | 0.0   | 0.0   | 2592.9         | 1007.1 | 1h     |
| R6b-S    | 0.0      | 0.0    | -       | -        | -      | 0.0                | 0.0   | 0.0   | 0.0   | 2347.4         | 1252.6 | 1h     |
| R7b-S    | 988.2    | 133.0  | *       | 290.341  | *      | 131.0              | 119.2 | 68.8  | 68.4  | 7.1            | 41.4   | 48.5   |
| R8b-S    | 12555.8  | 349.4  | *       | 532.284  | *      | 373.0              | 408.2 | 324.8 | 393.4 | 54.0           | 1560.9 | 1614.8 |
| R9b-S    | 368.2    | 1225.6 | 686.201 | 706.405  | 2.860% | 593.2              | 564.8 | 575.8 | 352.0 | 408.4          | 3191.6 | 1h     |
| R10b-S   | 0.0      | 3.2    | 193.037 | -        | -      | 408.0              | 440.0 | 385.6 | 212.8 | 1864.4         | 1735.6 | 1h     |

## References

- Tang J, Kong Y, Lau H, Ip AW, 2010 *A note on “efficient feasibility testing for dial-a-ride problems”*. *Operations Research Letters* 38(5):405–407, URL <http://dx.doi.org/10.1016/j.orl.2010.05.002>.
